# Supplementary material
Source: MDPI journal article supplement (https://www.mdpi.com/2076-3417/12/23/12370)
Supplement: s1 [file s1]

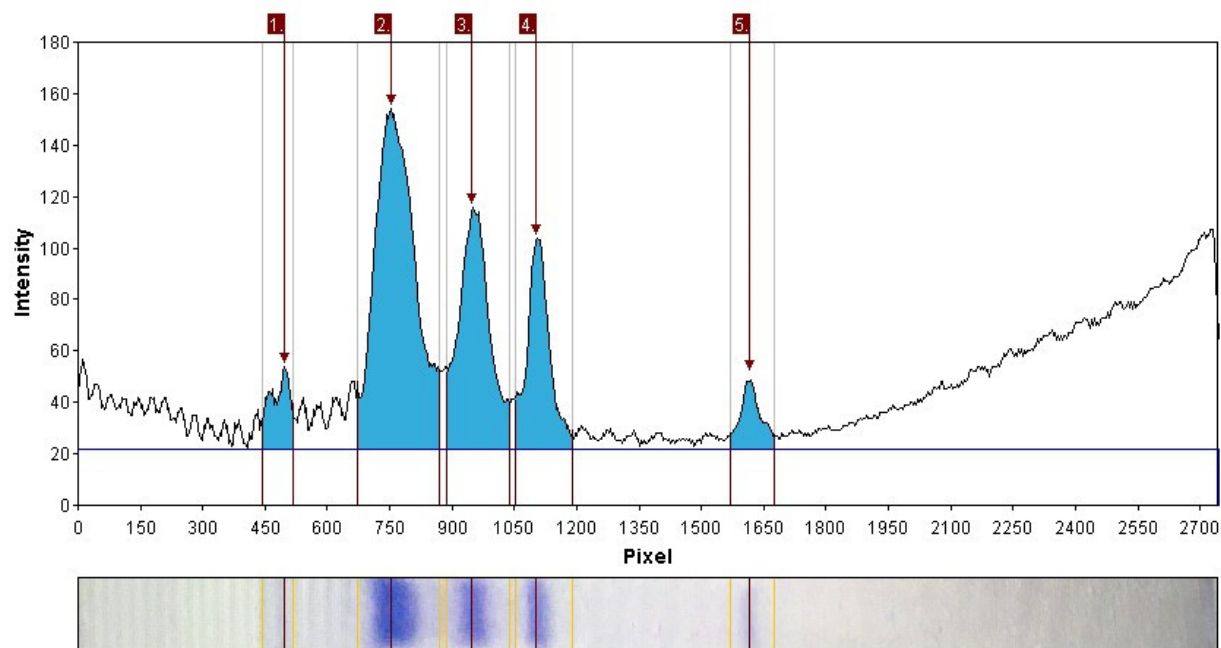

1 -1060 Da; 2 -3496 Da; 3 - 6500 Da; 4 - 14200 Da; 5 -17000 Da

**Figure S1.** The densitometric profile of low molecular weight standard markers (1.060-17.0kDa).

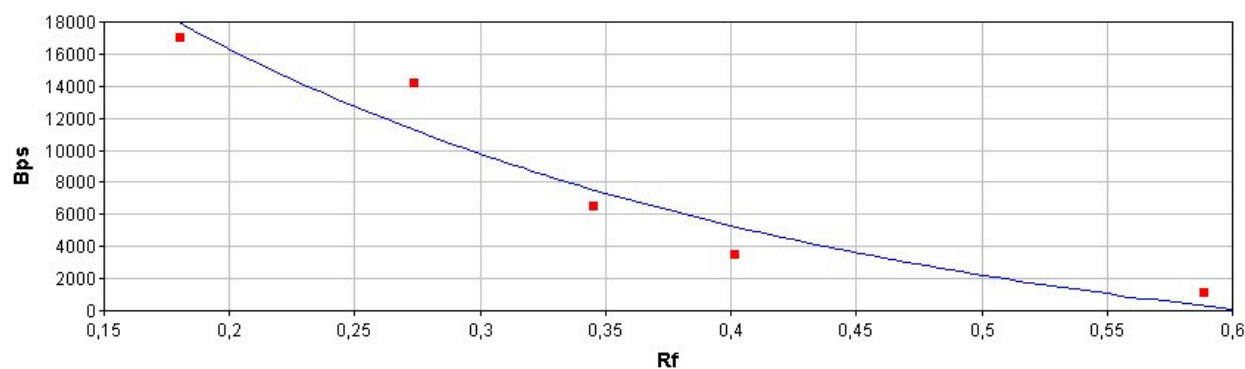

$$y = 44195,328236 * \exp(-3,755304 * x) - 4538,856131$$

$$R^2 = 0,926$$

**Figure S2.** Molecular weight calibration curve (based on the densitometric profile from Fig S1).

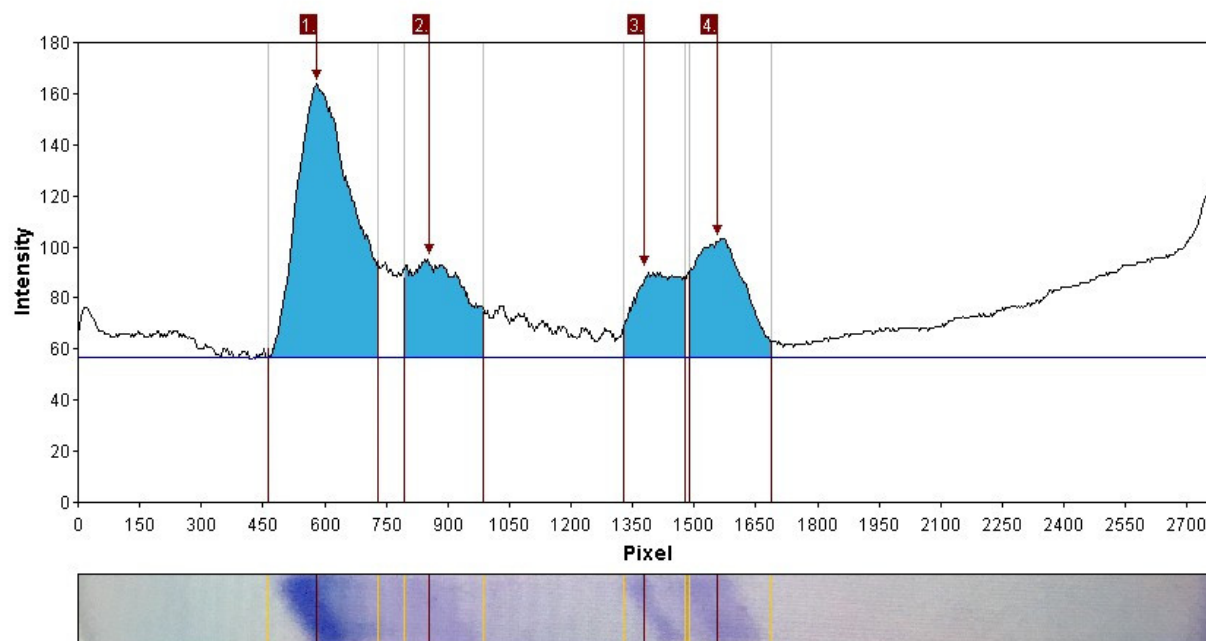

Figure S3. The densitometric profile of sample P1.

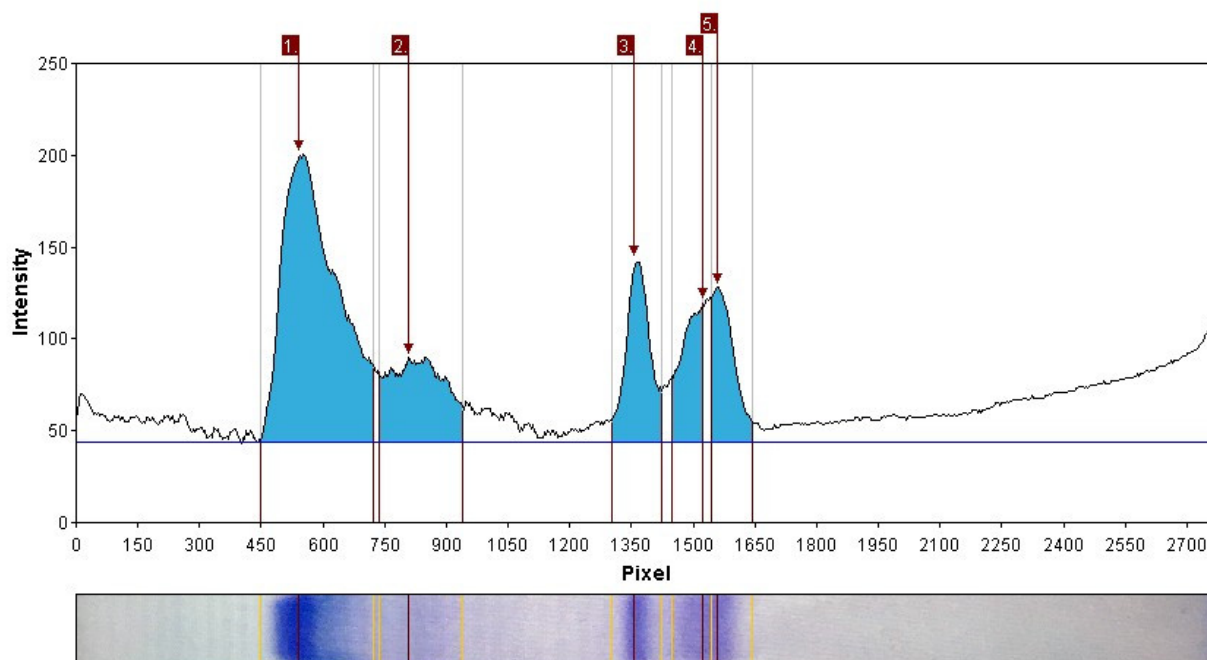

Figure S4. The densitometric profile of sample P2.

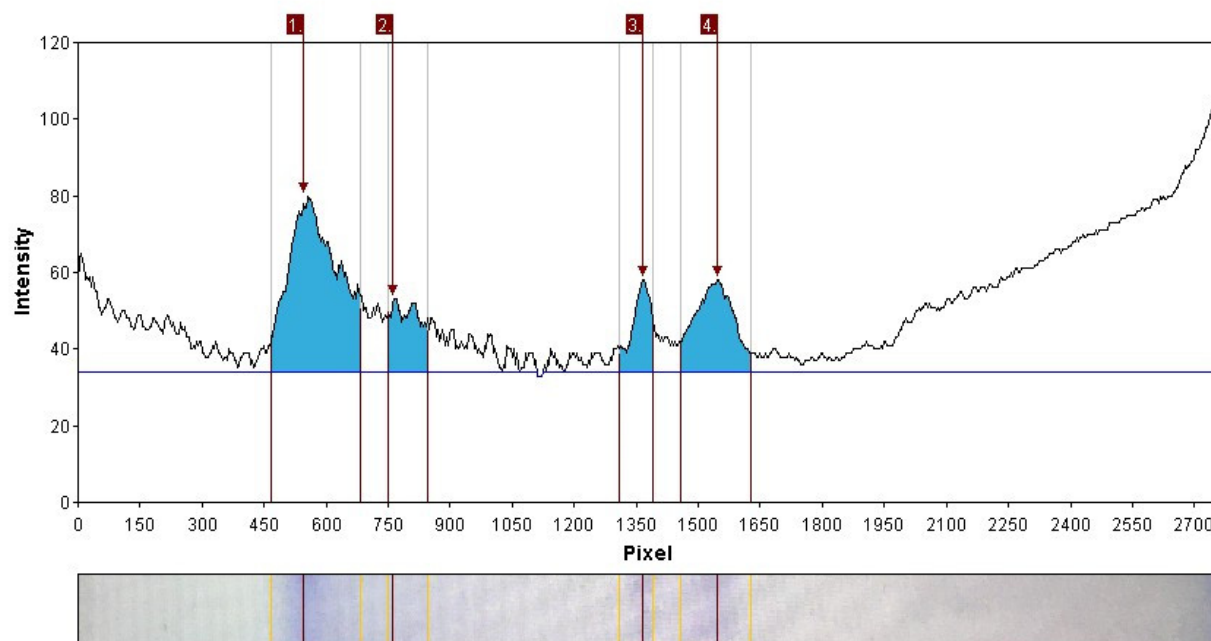

Figure S5. The densitometric profile of sample P3.

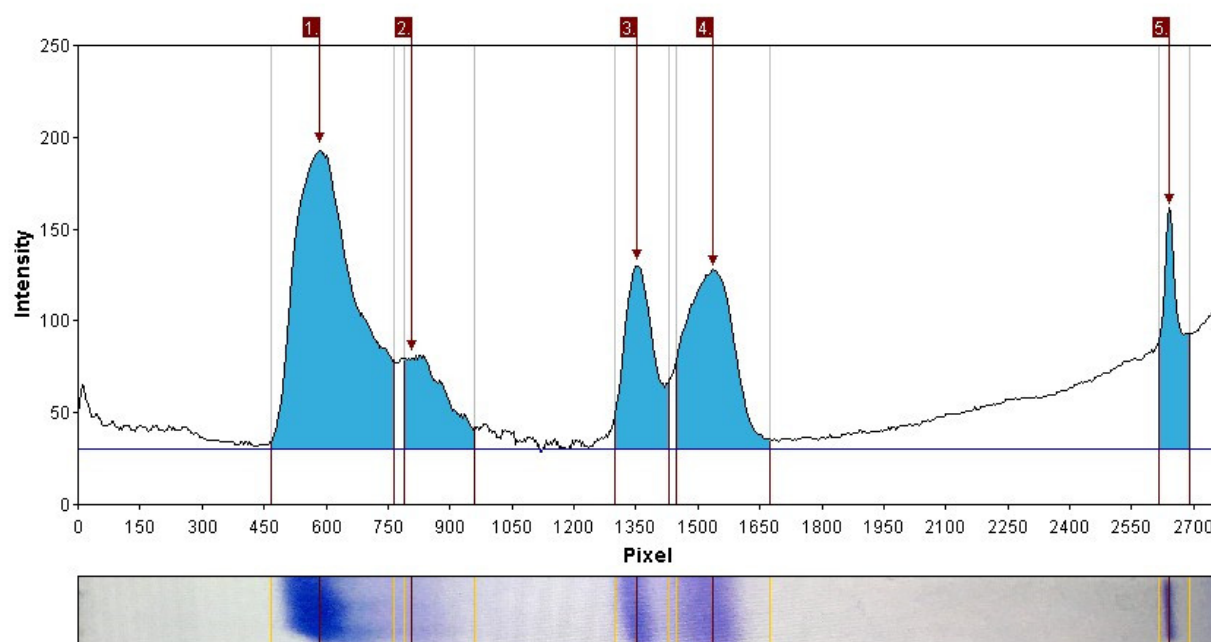

Figure S6. The densitometric profile of sample P4.

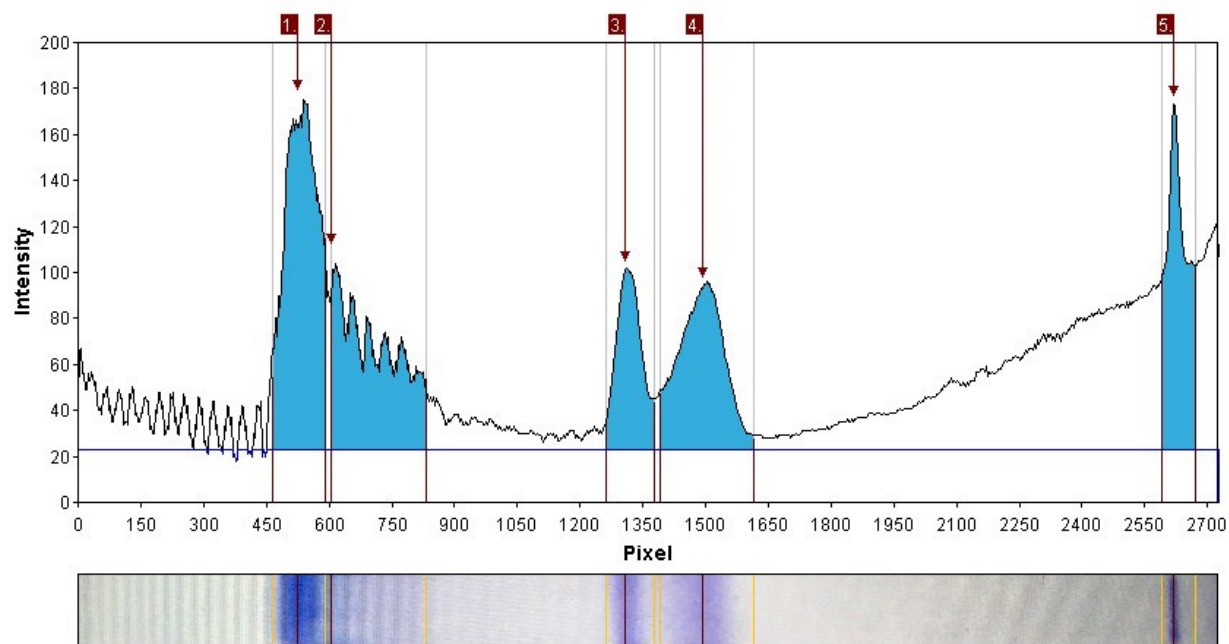

Figure S7. The densitometric profile of sample P5.

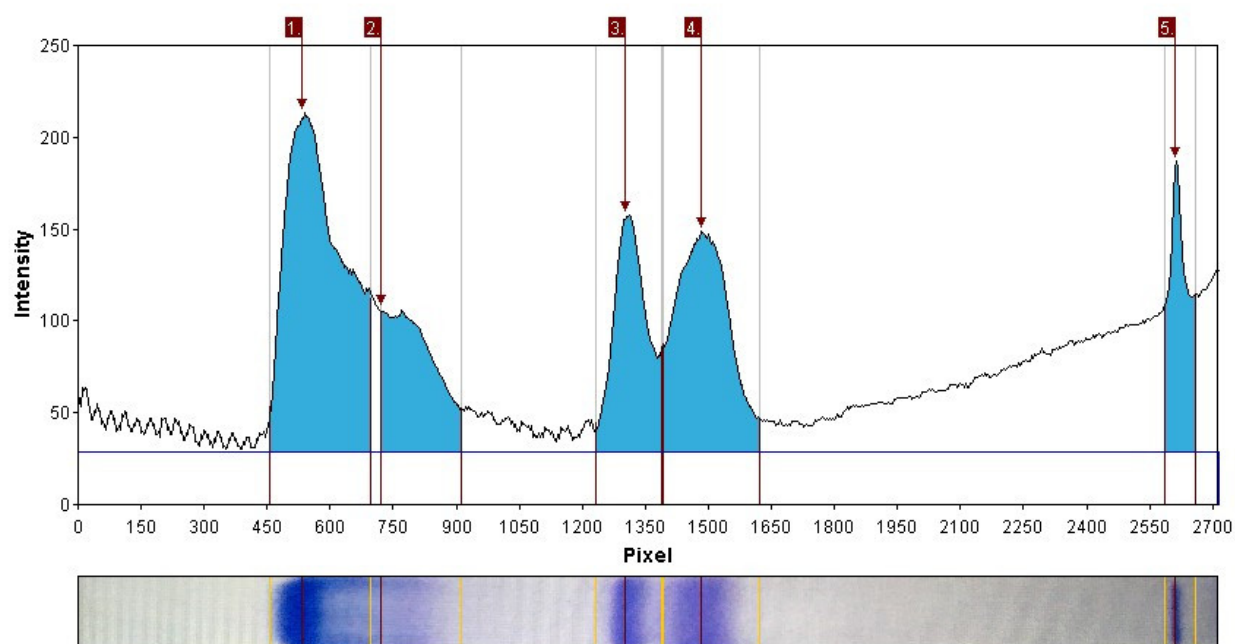

Figure S8. The densitometric profile of sample P6.

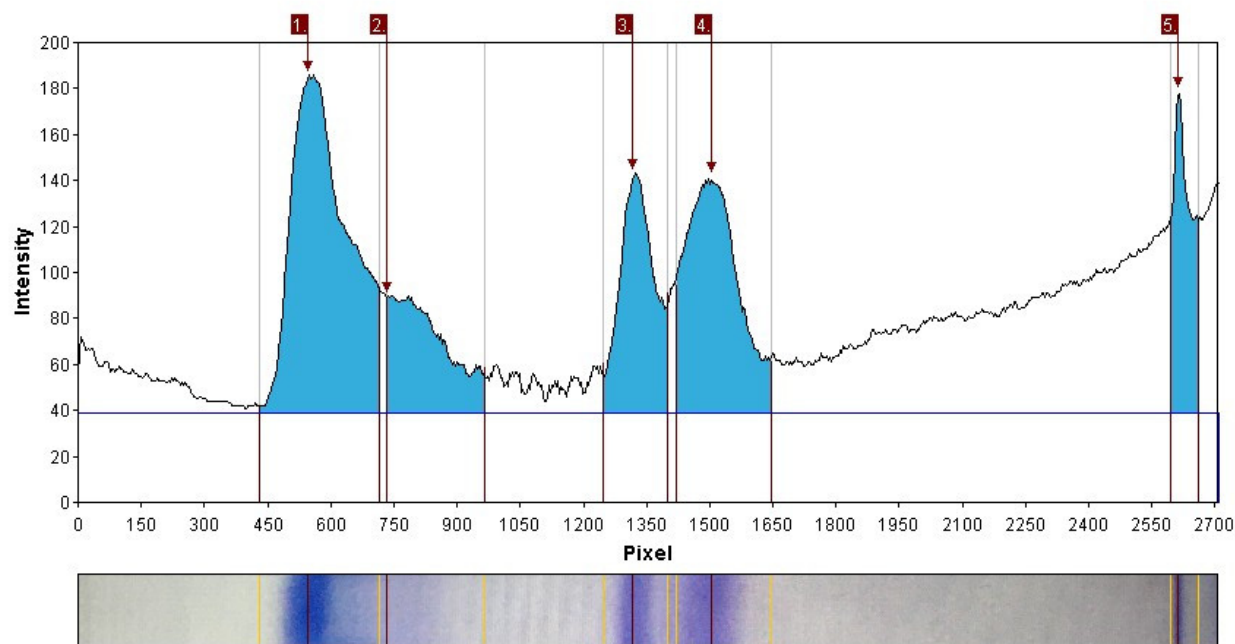

Figure S9. The densitometric profile of sample P7.

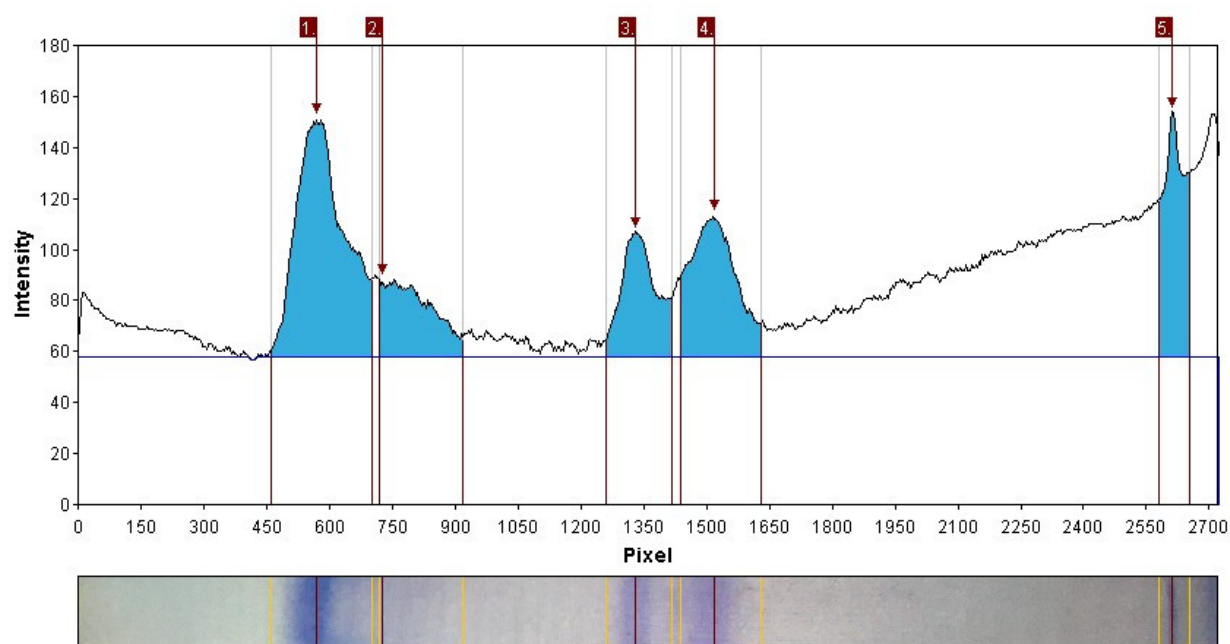

Figure S10. The densitometric profile of sample P8.

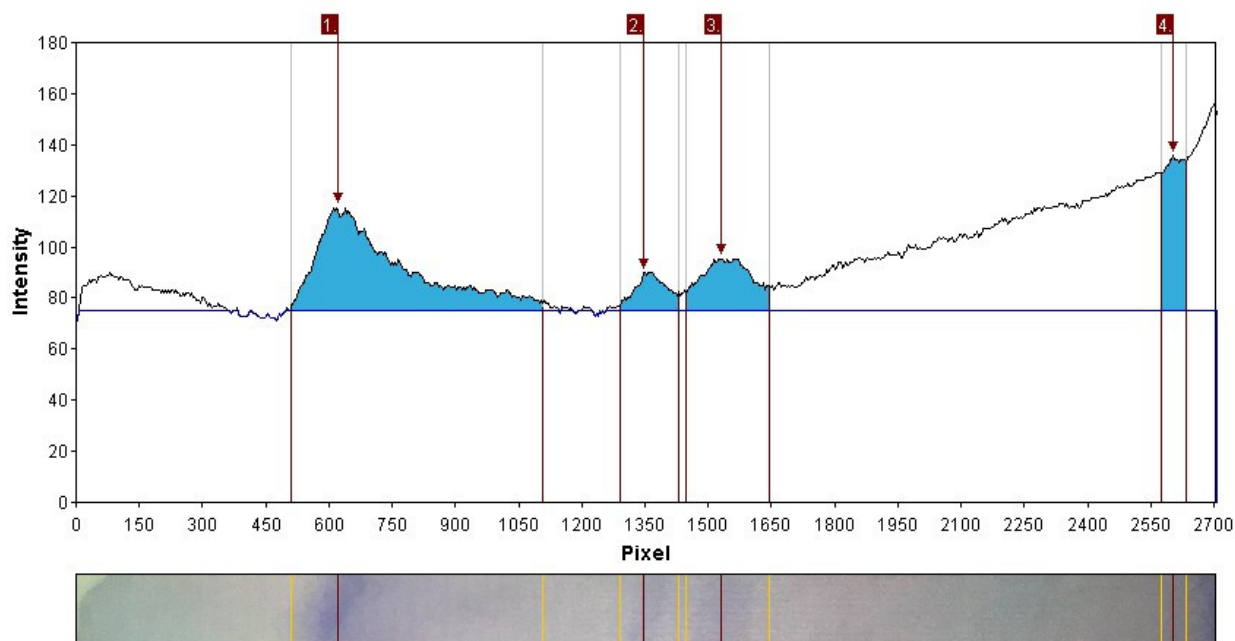

**Figure S11.** The densitometric profile of sample P9.

**Table S1.** Two-way ANOVA of the impact of E:S ratio and enzyme hydrolysis duration (EHD) on the DH.

| Tests of Between-Subjects Effects |                         |    |             |           |       |                     |                    |                             |
|-----------------------------------|-------------------------|----|-------------|-----------|-------|---------------------|--------------------|-----------------------------|
| Dependent Variable: DH            |                         |    |             |           |       |                     |                    |                             |
| Source                            | Type III Sum of Squares | df | Mean Square | F         | Sig.  | Partial Eta Squared | Noncent. Parameter | Observed Power <sup>b</sup> |
| Corrected Model                   | 3023.249 <sup>a</sup>   | 8  | 377.906     | 5663.774  | 0.000 | 1.000               | 45310.191          | 1.000                       |
| Intercept                         | 35351.634               | 1  | 35351.634   | 529823.87 | 0.000 | 1.000               | 529823.873         | 1.000                       |
| E:S_ratio                         | 1179.399                | 2  | 589.699     | 8837.973  | 0.000 | 0.999               | 17675.946          | 1.000                       |
| EHD                               | 1816.401                | 2  | 908.201     | 13611.431 | 0.000 | 0.999               | 27222.862          | 1.000                       |
| ES_ratio * EHD                    | 27.449                  | 4  | 6.862       | 102.846   | 0.000 | 0.958               | 411.384            | 1.000                       |
| Error                             | 1.201                   | 18 | 0.067       |           |       |                     |                    |                             |
| Total                             | 38376.084               | 27 |             |           |       |                     |                    |                             |
| Corrected Total                   | 3024.450                | 26 |             |           |       |                     |                    |                             |

---

EHD – enzyme hydrolysis duration

a. R Squared = 1.000 (Adjusted R Squared = 0.999)

b. Computed using alpha = 0.05

**Table S2.** Two-way ANOVA of the impact of E:S ratio and enzyme hydrolysis duration (EHD) on the AChE inhibitory activity.

Tests of Between-Subjects Effects  
Dependent Variable: AcheInh

| Source          | Type III Sum of Squares | df | Mean Square | F         | Sig.  | Partial Eta Squared | Noncent. Parameter | Observed Power <sup>b</sup> |
|-----------------|-------------------------|----|-------------|-----------|-------|---------------------|--------------------|-----------------------------|
| Corrected Model | 3655.927 <sup>a</sup>   | 8  | 456.991     | 38.144    | 0.000 | 0.944               | 305.150            | 1.000                       |
| Intercept       | 767197.470              | 1  | 767197.470  | 64035.896 | 0.000 | 1.000               | 64035.896          | 1.000                       |
| ES_ratio        | 9500126                 | 2  | 475.063     | 39.652    | 0.000 | 0.815               | 79.305             | 1.000                       |
| EHD             | 2489.308                | 2  | 1244.654    | 103.888   | 0.000 | 0.920               | 207.776            | 1.000                       |
| ES_ratio * EHD  | 216.491                 | 4  | 54.123      | 4.517     | 0.011 | 0.501               | 18.070             | 0.864                       |
| Error           | 215.653                 | 18 | 11.981      |           |       |                     |                    |                             |
| Total           | 771069.050              | 27 |             |           |       |                     |                    |                             |
| Corrected Total | 3871.580                | 26 |             |           |       |                     |                    |                             |

EHD – enzyme hydrolysis duration

a. R Squared = 0.944 (Adjusted R Squared = 0.920)

b. Computed using alpha = 0.05

**Table S3.** Tukey HSD multiple comparisons on the AChE inh. between E:S ratio levels.

| Multiple Comparisons          |              |                 |            |       |                         |             |
|-------------------------------|--------------|-----------------|------------|-------|-------------------------|-------------|
| Dependent Variable: AChE Inh. |              |                 |            |       |                         |             |
| Tukey HSD                     |              |                 |            |       |                         |             |
| (I) ES_ratio                  | (J) ES_ratio | Mean Difference |            |       | 95% Confidence Interval |             |
|                               |              | (I-J)           | Std. Error | Sig.  | Lower Bound             | Upper Bound |
| 0.5                           | 1            | 8.0667*         | 1.631      | 0.000 | 3.9023                  | 12.2310     |
|                               | 2            | 14.5000*        | 1.631      | 0.000 | 10.3357                 | 18.6643     |
| 1                             | 0.5          | -8.0667*        | 1.631      | 0.000 | -12.2310                | -3.9023     |
|                               | 2            | 6.4333*         | 1.631      | 0.003 | 2.2690                  | 10.5977     |
| 2                             | 0.5          | -14.5000*       | 1.631      | 0.000 | -18.6643                | -10.3357    |
|                               | 1            | -6.4333*        | 1.631      | 0.003 | -10.5977                | -2.2690     |

Based on observed means.

The error term is Mean Square (Error) = 11.981

\* The mean difference is significant at the 0.05 level.

**Table S4.** Tukey HSD multiple comparisons on the AChE inh. between EHD.

| Multiple Comparisons          |         |                 |            |       |                         |             |
|-------------------------------|---------|-----------------|------------|-------|-------------------------|-------------|
| Dependent Variable: AChE Inh. |         |                 |            |       |                         |             |
| Tukey HSD                     |         |                 |            |       |                         |             |
| (I) EHD                       | (J) EHD | Mean Difference |            |       | 95% Confidence Interval |             |
|                               |         | (I-J)           | Std. Error | Sig.  | Lower Bound             | Upper Bound |
| 30                            | 60      | 22.1222*        | 1.63168    | 0.000 | 17.9579                 | 26.2865     |
|                               | 120     | 17.9778*        | 1.63168    | 0.000 | 13.8135                 | 22.1421     |
| 60                            | 30      | -22.1222*       | 1.63168    | 0.000 | -26.2865                | -17.9579    |
|                               | 120     | -4.1444         | 1.63168    | 0.051 | -8.3088                 | 0.0199      |
| 120                           | 30      | -17.9778*       | 1.63168    | 0.000 | -22.1421                | -13.8135    |
|                               | 60      | 4.1444          | 1.63168    | 0.051 | -0.0199                 | 8.3088      |

**Table S5.** Two-way ANOVA of the impact of E:S ratio and enzyme hydrolysis duration (EHD) on AOA (FRAP).

| Tests of Between-Subjects Effects |                         |    |             |          |       |                     |                    |                             |
|-----------------------------------|-------------------------|----|-------------|----------|-------|---------------------|--------------------|-----------------------------|
| Dependent Variable: FRAP          |                         |    |             |          |       |                     |                    |                             |
| Source                            | Type III Sum of Squares | df | Mean Square | F        | Sig.  | Partial Eta Squared | Noncent. Parameter | Observed Power <sup>b</sup> |
| Corrected Model                   | 2.549 <sup>a</sup>      | 8  | 0.319       | 1.666    | 0.166 | 0.388               | 13.327             | 0.563                       |
| Intercept                         | 852.078                 | 1  | 852.078     | 4454.218 | 0.000 | 0.995               | 4454.218           | 1.000                       |
| ES_ratio                          | 1.980                   | 2  | 0.990       | 5.175    | 0.015 | 0.330               | 10.351             | 0.768                       |
| EHD                               | 0.276                   | 2  | 0.138       | 0.722    | 0.044 | 0.064               | 1.444              | 0.156                       |
| ES_ratio * EHD                    | 0.278                   | 4  | 0.069       | 0.363    | 0.832 | 0.065               | 1.453              | 0.116                       |
| Error                             | 4.017                   | 21 | 0.191       |          |       |                     |                    |                             |
| Total                             | 984.461                 | 30 |             |          |       |                     |                    |                             |
| Corrected Total                   | 6.567                   | 29 |             |          |       |                     |                    |                             |

EHD – enzyme hydrolysis duration

a. R Squared = 0.388 (Adjusted R Squared = 0.155)

b. Computed using alpha = 0.05

**Table S6.** Two-way ANOVA of the impact of E:S ratio and enzyme hydrolysis duration (EHD) on AOA (CUPRAC).

| Tests of Between-Subjects Effects |                         |    |             |         |       |                     |                    |                |
|-----------------------------------|-------------------------|----|-------------|---------|-------|---------------------|--------------------|----------------|
| Dependent Variable: CUPRAC        |                         |    |             |         |       |                     |                    |                |
| Source                            | Type III Sum of Squares | df | Mean Square | F       | Sig.  | Partial Eta Squared | Noncent. Parameter | Observed Power |
| Corrected Model                   | 0.212 <sup>a</sup>      | 8  | 0.026       | 2.626   | 0.036 | 0.500               | 21.006             | 0.797          |
| Intercept                         | 3.807                   | 1  | 3.807       | 377.521 | 0.000 | 0.947               | 377.521            | 1.000          |
| ES_ratio                          | 0.043                   | 2  | 0.021       | 2.116   | 0.013 | 0.168               | 4.233              | 0.385          |
| EHD                               | 0.038                   | 2  | 0.019       | 1.863   | 0.047 | 0.151               | 3.726              | 0.343          |
| ES_ratio * EHD                    | 0.056                   | 4  | 0.014       | 1.388   | 0.272 | 0.209               | 5.552              | 0.356          |
| Error                             | 0.212                   | 21 | 0.010       |         |       |                     |                    |                |
| Total                             | 4.924                   | 30 |             |         |       |                     |                    |                |
| Corrected Total                   | 0.424                   | 29 |             |         |       |                     |                    |                |

EHD – enzyme hydrolysis duration

a. R Squared = 0.500 (Adjusted R Squared = 0.310)

b. Computed using alpha = 0.05

**Table S7.** Two-way ANOVA of the impact of E:S ratio and enzyme hydrolysis duration (EHD) on AOA (DPPH).

| Tests of Between-Subjects Effects |                         |    |             |         |       |                     |                    |                             |
|-----------------------------------|-------------------------|----|-------------|---------|-------|---------------------|--------------------|-----------------------------|
| Dependent Variable: DPPH          |                         |    |             |         |       |                     |                    |                             |
| Source                            | Type III Sum of Squares | df | Mean Square | F       | Sig.  | Partial Eta Squared | Noncent. Parameter | Observed Power <sup>b</sup> |
| Corrected Model                   | 0.106 <sup>a</sup>      | 8  | 0.013       | 0.644   | 0.732 | 0.197               | 5.154              | 0.222                       |
| Intercept                         | 11.423                  | 1  | 11.423      | 557.923 | 0.000 | 0.964               | 557.923            | 1.000                       |
| ES_ratio                          | 0.053                   | 2  | 0.027       | 1.304   | 0.029 | 0.110               | 2.608              | 0.251                       |
| EHD                               | 0.027                   | 2  | 0.013       | 0.654   | 0.530 | 0.059               | 1.308              | 0.145                       |
| ES_ratio * EHD                    | 0.050                   | 4  | 0.012       | 0.607   | 0.662 | 0.104               | 2.427              | 0.169                       |
| Error                             | 0.430                   | 21 | 0.020       |         |       |                     |                    |                             |



|                 |        |    |
|-----------------|--------|----|
| Total           | 13.869 | 30 |
| Corrected Total | 0.535  | 29 |

EHD – enzyme hydrolysis duration  
a. R Squared = 0.197 (Adjusted R Squared = -0.109)  
b. Computed using alpha = 0.05

**Table S8.** Two-way ANOVA of the impact of E:S ratio and enzyme hydrolysis duration (EHD) on AOA (ABTS).

| Tests of Between-Subjects Effects |                         |    |             |          |       |                     |                    |                             |
|-----------------------------------|-------------------------|----|-------------|----------|-------|---------------------|--------------------|-----------------------------|
| Dependent Variable: ABTS          |                         |    |             |          |       |                     |                    |                             |
| Source                            | Type III Sum of Squares | df | Mean Square | F        | Sig.  | Partial Eta Squared | Noncent. Parameter | Observed Power <sup>b</sup> |
| Corrected Model                   | 0.221a                  | 8  | 0.028       | 3.653    | 0.008 | 0.582               | 29.225             | 0.925                       |
| Intercept                         | 23.615                  | 1  | 23.615      | 3129.829 | 0.000 | 0.993               | 3129.829           | 1.000                       |
| ES_ratio                          | 0.158                   | 2  | 0.079       | 10.440   | 0.001 | 0.499               | 20.879             | 0.974                       |
| EHD                               | 0.013                   | 2  | 0.007       | 0.879    | 0.043 | 0.077               | 1.757              | 0.181                       |
| ES_ratio * EHD                    | 0.001                   | 4  | 0.000       | 0.023    | 0.999 | 0.004               | .093               | 0.054                       |
| Error                             | 0.158                   | 21 | 0.008       |          |       |                     |                    |                             |
| Total                             | 27.151                  | 30 |             |          |       |                     |                    |                             |
| Corrected Total                   | 0.379                   | 29 |             |          |       |                     |                    |                             |

EHD – enzyme hydrolysis duration  
a. R Squared = 0.582 (Adjusted R Squared = 0.423)  
b. Computed using alpha = 0.05
